# Supplementary material for: Effect of natural electric field on bioconjugation, secondary structure and the crystallization mechanism of peptide composite with gold nanoparticles on mica surface (R2)
Source: Royal Society of Chemistry journal article supplement (doi:10.1039/d5ce00948k), 2025-11-25
Supplement: d5ce00948k2.pdf [file d5ce00948k2.pdf]

Supporting Information to  
Alexander I. Loskutov and Ekaterina G. Volkova “Effect of Natural Electric Field on  
Bioconjugation, Secondary Structure and Crystallization Mechanism of Peptide  
Composite with Gold Nanoparticles on Mica Surface”

Supporting Information available free of charge using the link <http://>

Raw Spectral Data Base is available free of charge using the link <http://> DB raw  
spectra.rar

**CHEMICALS**

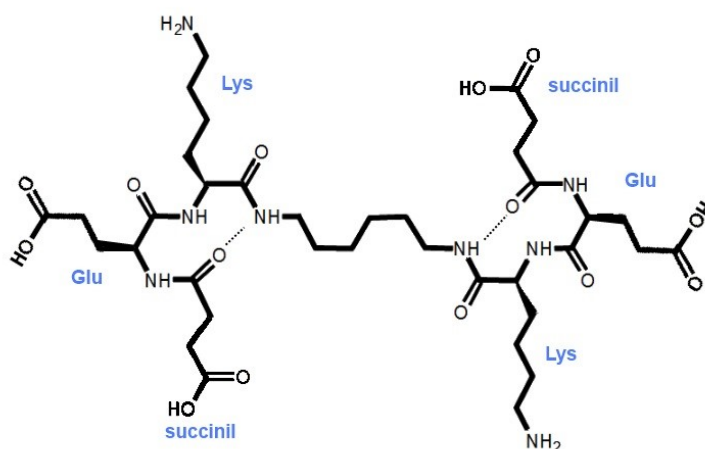

**Figure SI 1.** The Structure of hexamethylenediaminebis (N-monosuccinylglutamyllysine) dipeptide molecule.

**PROBE MICROSCOPY**

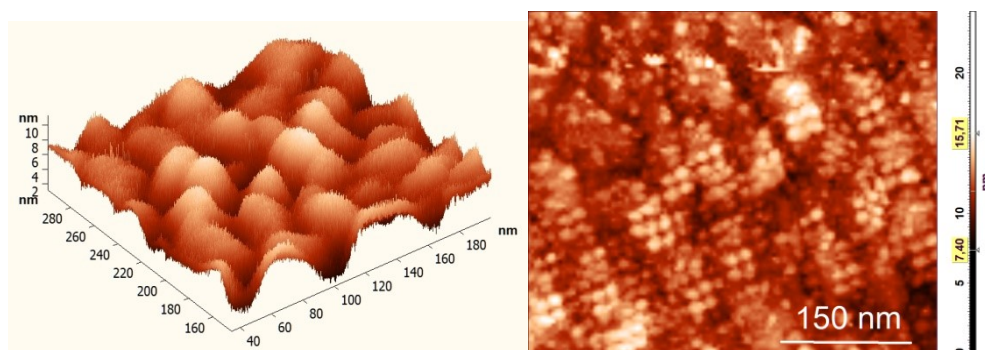

**Figure SI 2.** AFM images of different areas on the original surface of the gold film after magnetron deposition.

### ***XPS MEASUREMENTS***

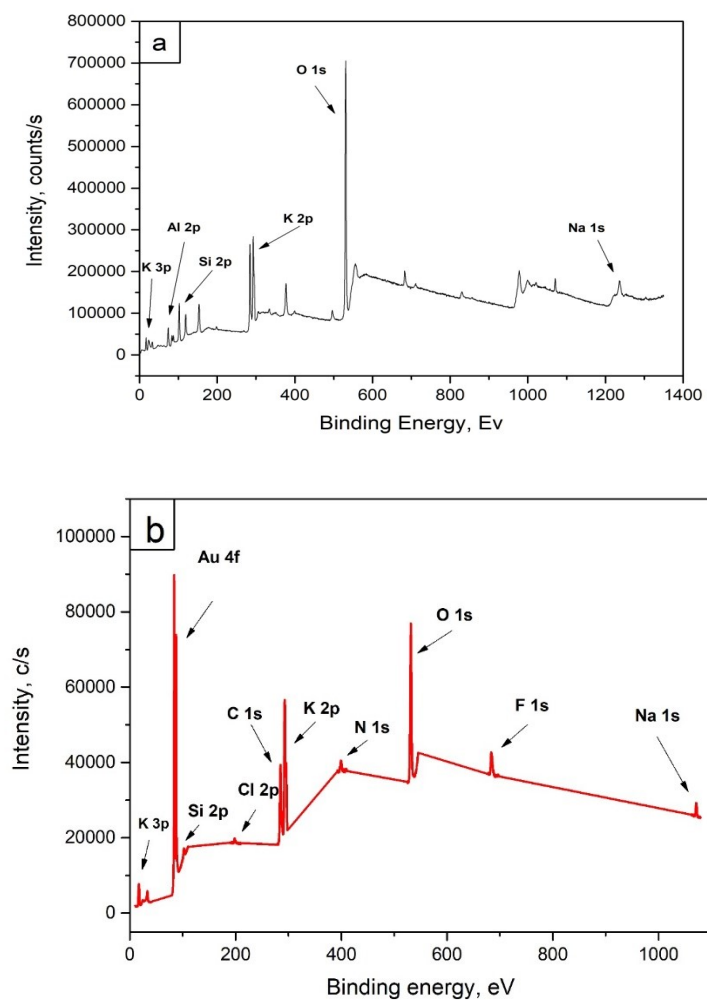

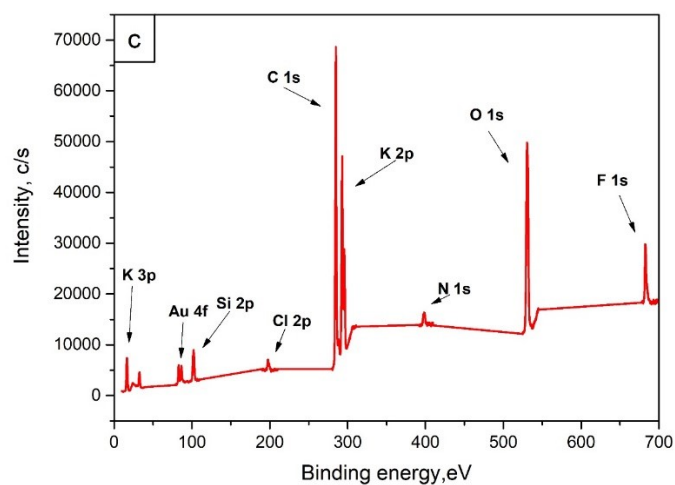

**Figure SI 3.** XPS survey spectra of the clean mica surface (a) and PT-nAu composite layers on gold (b) and mica (c).

### *IR AND RAMAN MEASUREMENTS*

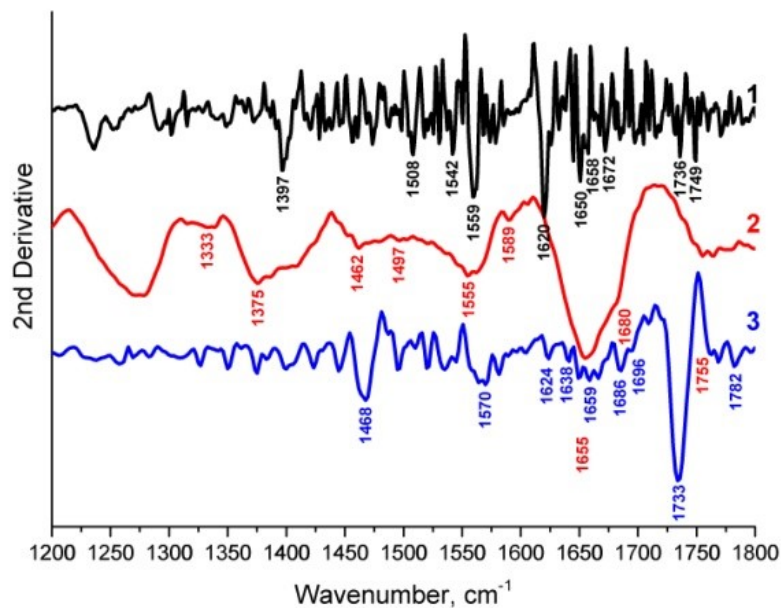

**Figure SI 4.** Mathematical processing of IR spectra of solid DPT-nAu layers: transmission (1) and reflection spectra of solid layers, formed on the substrates: gold (2) and mica (3).

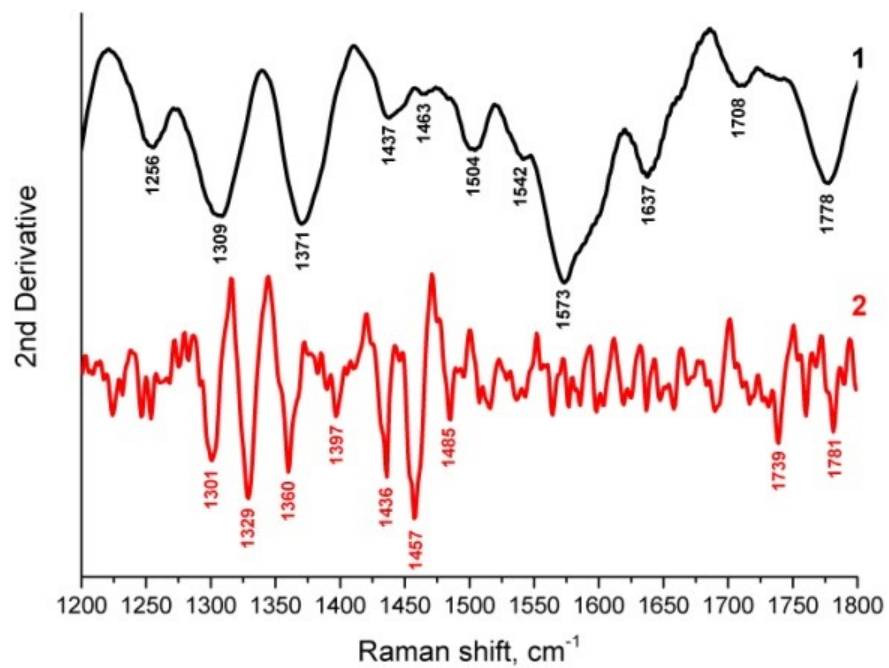

**Figure SI 5.** Mathematical processing of Raman spectra of solid PT-nAu layers, formed on the substrates: gold (1) and mica (2).
